# Supplementary material for: Short-term effects of thinning on the development and communities of understory vegetation of Chinese fir plantations in Southeastern China
Source: PeerJ. 2020 Feb 11;8:e8536. doi: 10.7717/peerj.8536 (PMC7020821; doi:10.7717/peerj.8536)
Supplement: Supplemental Information 1 — values: environmental factors, soil properties, average diameter, species richness, coverage and biomass; community: the number of species presence. [file peerj-08-8536-s002.xlsx]

## Sheet: values
Plots	Basic conditions od plots					Soil properties												Average DBH							Species richness				Coverage (%)				Biomass (kg ha-1)
	Tree density (stem ha-1)	Aspect (°)	T-Aspect	Slope (°)	Position	SMC (%)	pH	SOC(g kg-1)	TN(g kg-1)	TP(g kg-1)	AN(mg kg-1)	AP(mg kg-1)	AK(mg kg-1)	Mg(mg kg-1)	Mn(mg kg-1)	MBC(mg kg-1)	MBN(mg kg-1)	Brfore thinning	2013	2014	2015	2016	2017	2018	Shrub-2015	Herb-2015	Shrub-2016	Herb-2016	Shrub-2015	Herb-2015	Shrub-2016	Herb-2016	Shrub-2016	Herb-2016
CK1	2900	311	0.404596	32	Upper	27.9642	4.46	18.3333	0.106517	0.322883	90.5	1.23569	51.0667	56.4833	42.4667	168	37	11.8098	11.8098	12.6152	13.195	13.9408	14.7331	15.3215	6	11	5	12	1.32	12.38	2.12	29.8	9.148	175.525
CK2	2933	310	0.413176	31	Middle	38.2066	4.16167	23.9667	0.0989167	0.33185	143	2.12452	58.9333	78.6667	104.967	54.2	35.2	12.7901	12.7901	13.6642	14.1249	14.8757	15.5737	16.051	6	8	5	8	1.56	8.98	2.44	24.8	2.75733	80.5917
CK3	3067	303	0.473832	34	Lower	22.3613	4.57833	19.8333	0.157	0.290317	122.667	2.03781	64.2667	72.4333	109.517	141	51.8	13.2456	13.2456	14.3087	14.7071	15.6228	16.2409	16.9154	4	7	5	7	1.88	4.86	2.19	15.2	26.7625	70.85
LIT1	2467	304	0.465122	35	Upper	31.9304	4.49167	35.6667	0.253767	0.28645	149	2.81824	46.7333	66.5167	56.45	141	37	13.1867	13.309	14.0471	14.4366	15.1415	15.7009	16.4906	6	13	6	12	1.33333	19.38	1.825	30.64	2.08	150.6
LIT2	2500	346	0.14033	32	Middle	37.6679	4.225	32.3333	0.184333	0.354617	160.667	3.94554	49.7	88.5167	117.733	64.5	29.6	11.8511	12.1787	13.279	13.9509	15.2413	16.2547	16.9899	8	10	8	16	5.04	23.84	9.82	78.98	75.1388	393.145
LIT3	2375	292	0.569587	31	Lower	21.4923	4.4	37.1667	0.192417	0.321117	203.667	4.61759	58	85.1667	193.217	293	31.5	12.9935	13.221	14.6318	15.2489	16.4282	17.2732	18.3622	5	11	7	17	4.18	11.44	8.17	38	91.7736	394.717
MIT1	1933	295	0.543578	30	Upper	32.9277	4.38333	34.4	0.2146	0.277983	155.333	3.31686	41.1333	58.95	52.0167	167	51.8	13.4883	14.0365	14.8806	15.4156	16.2536	17.0217	17.8539	12	14	9	15	5.552	20.54	6.012	42.38	148.783	556.277
MIT2	2033	300	0.5	33	Middle	39.997	4.24833	32.2	0.219383	0.308067	154.667	3.20846	53.2667	79.2167	78.8333	222	16.7	12.7049	12.9672	14.1673	14.8046	16.0725	17.345	18.1565	12	13	9	16	11.9	31.52	15.66	80.6	117.072	547.698
MIT3	2125	296	0.534878	33	Lower	21.783	4.38333	22.1667	0.12715	0.328567	130.233	3.99757	49.2	81.3833	133.417	276	38.9	13.0989	13.6508	15.2267	15.7	16.8893	17.7375	18.8013	7	15	12	16	4.54	11.725	8.62	38.675	115.923	403.876
HIT1	1500	296	0.534878	31	Upper	32.4106	4.49667	54.8667	0.40905	0.3694	189.667	5.93999	67.2667	56.3	75.5333	107	55.6	12.031	12.0769	13.2788	13.9903	15.4258	16.7222	17.5364	9	16	13	17	13.42	24.34	28.99	64.32	803.777	1626.71
HIT2	1667	303	0.473832	39	Middle	47.9239	4.25	34.4	0.225283	0.356983	175.667	4.46583	76.6667	79.7667	128.133	243	180	12.9623	13.4317	14.5301	15.2053	16.479	17.4427	18.4305	12	13	13	22	12.38	31.94	19.85	85.7	128.088	689.063
HIT3	1633	318	0.345492	31	Lower	22.2492	4.53167	39.2667	0.20695	0.3221	121.667	3.79657	67.4	86.5333	159.917	99.1	51.8	12.9114	13.1428	14.5001	15.2724	16.6272	17.6816	18.7385	9	19	12	16	11.48	49.04	25.912	125.78	303.442	856.356

## Sheet: species presence
Plots	Shrub layers																															Herb layers
	Meliosma rigida	Ribes fasciculatum	Aralia elata	Ficus hirta	Rubus alceifolius	Cardiospermum halicacabum	Premna microphylla	Vaccinium carlesii	Rubus lambertianus	Symplocos lancifolia	Symplocos sumuntia	Machilus grijsii	Maesa perlarius	Loropetalum chinense	Rubus rosifolius	Callicarpa giraldii	Millettia nidita	Millettia speciosa	Nandina domestica	Kadsura longipedunculata	Litsea cubeba	Rubus corchorifolius	Sapium discolor	Ardisia lindleyana	Glochidion puberum	Eurya nitida	Antidesma pseudomicrophyllum	Millettia dielsiana	Ilex purpurea	Mussaenda pubescens	Eurya rubiginosa var. attenuata	Pteris semipinnata	Dryopteris labordei	Allantodia virescens	Lophatherum gracile	Melastoma dodecandrum	Cyrtomium conforme	Angiopteris fokiensis	Woodwardia japonica	Setaria viridis	Lygodium japonicum	Dryopteris fuscipes	Dryopteris erythrosora	Microlepia hancei	Paederia scandens	Allantodia metteniana	Parathelypteris glanduligera	Selaginella tamariscina	Acystopteris japonica
CK1	1	0	0	5	0	0	0	3	0	0	0	0	0	0	0	3	0	2	0	0	0	0	0	0	0	0	0	0	0	0	0	3	0	0	11	0	10	0	9	0	0	0	0	8	0	19	0	0	7
CK2	0	0	0	7	0	0	0	0	0	1	6	0	0	0	0	3	0	0	0	0	0	0	0	2	0	0	0	0	0	0	0	0	0	0	9	0	0	0	16	0	0	6	0	12	0	30	0	0	7
CK3	0	0	0	15	0	0	0	0	0	0	1	0	8	0	0	8	0	0	0	0	0	0	0	0	0	0	0	0	0	1	0	0	0	0	0	0	0	0	11	0	2	0	0	19	0	29	0	0	1
LIT1	0	0	0	2	0	0	1	0	0	0	0	0	0	0	0	6	0	0	0	2	0	0	0	1	0	0	0	0	0	1	0	2	0	5	0	0	8	0	15	0	0	0	0	5	0	18	0	0	11
LIT2	0	0	0	7	0	0	0	1	0	0	0	2	7	0	0	22	0	0	0	0	0	0	0	10	0	0	1	0	0	0	0	6	7	8	16	0	6	0	6	0	2	7	0	22	0	15	0	0	8
LIT3	0	0	0	2	0	0	1	0	0	0	6	2	16	0	0	46	0	0	0	0	0	0	0	3	0	0	0	0	0	34	0	1	0	0	11	0	4	3	14	0	5	0	0	19	0	87	5	0	10
MIT1	3	0	0	3	0	3	2	0	2	0	0	0	0	0	0	17	3	1	0	0	0	0	0	0	0	0	0	0	0	1	0	3	0	5	0	0	6	0	11	0	4	0	0	5	0	17	2	0	13
MIT2	0	1	0	11	1	0	17	0	0	6	0	0	5	5	0	51	0	3	0	0	0	0	1	14	0	0	0	0	0	13	0	4	0	7	0	1	2	0	6	0	3	0	0	33	0	31	0	0	38
MIT3	0	0	0	18	0	0	1	0	0	0	0	2	4	0	0	25	0	0	10	0	0	0	0	9	0	4	0	1	0	0	0	1	0	2	0	0	0	3	8	0	0	8	2	5	0	36	0	0	7
HIT1	0	0	0	13	0	16	1	0	3	0	0	0	10	7	5	76	0	2	0	0	0	13	0	0	1	0	0	0	0	7	6	4	0	0	43	0	9	0	15	1	8	5	0	5	0	15	10	0	15
HIT2	0	1	0	14	0	1	0	0	1	1	0	0	4	0	0	44	0	0	0	0	2	0	0	6	0	0	0	9	5	40	0	1	0	8	3	0	0	0	17	5	3	8	0	40	0	44	5	0	64
HIT3	0	0	2	10	0	0	0	0	0	2	2	2	48	0	0	69	0	0	7	0	1	0	0	14	0	0	0	4	1	8	0	22	0	0	43	0	6	0	28	10	11	23	0	39	3	55	18	7	47
[truncated: 11 more columns]
